# Supplementary material for: Emotional Response Inhibition: A Shared Neurocognitive Deficit in Eating Disorder Symptoms and Nonsuicidal Self-Injury
Source: Preprints.org preprint supplement (doi:10.20944/preprints201912.0193.v1), 2019-12-15
Supplement: Supplementary file 1 [file supplementary]

**Supplementary Table 1.** ZINB regression analyses predicting past-month overeating frequency ( $N = 102$ )

| EDE-Q Overeating                |                                                                      |              |                       |             |  |
|---------------------------------|----------------------------------------------------------------------|--------------|-----------------------|-------------|--|
|                                 | Logistic Model                                                       |              | Count Model           |             |  |
| <u>Step 1.</u>                  | <u>B (SE)</u>                                                        | <u>IRR</u>   | <u>B (SE)</u>         | <u>IRR</u>  |  |
| Sex                             | 0.56 (1.28)                                                          | 1.75         | 0.53 (0.56)           | 1.69        |  |
| Orientation                     | 0.71 (1.00)                                                          | 2.03         | 0.66 (0.59)           | 1.93        |  |
| Race                            | 0.28 (0.66)                                                          | 1.32         | -0.50 (0.34)          | 0.61        |  |
| NSSI History                    | -0.23 (0.98)                                                         | 0.79         | 0.10 (0.50)           | 1.10        |  |
| ESST Accuracy                   | -0.05 (0.03)                                                         | 0.95         | <b>-0.06 (0.21)**</b> | <b>0.95</b> |  |
| <b>Step 1:</b>                  | $\chi^2(10, 89) = 16.47$ , Log-likelihood: -195.49                   |              |                       |             |  |
| <u>Step 2.</u>                  | <u>B (SE)</u>                                                        | <u>IRR</u>   | <u>B (SE)</u>         | <u>IRR</u>  |  |
| Negative Urgency                | <b>-0.09 (0.04)*</b>                                                 | <b>0.92</b>  | <b>0.05 (0.02)**</b>  | <b>1.06</b> |  |
| NEAT <sup>a</sup>               | 0.00 (0.03)                                                          | 1.00         | <b>0.03 (0.01)*</b>   | <b>1.03</b> |  |
| <b>Step 2:</b>                  | $\chi^2(2, 87) = 19.44^{***}$ , Log-likelihood: -186.08              |              |                       |             |  |
| <b>Step 2 model comparison:</b> | $\chi^2(0, 15) = 11.36^{***}$ , Log-likelihood: -191.76 <sup>a</sup> |              |                       |             |  |
| <u>Step 3.</u>                  | <u>B (SE)</u>                                                        | <u>IRR</u>   | <u>B (SE)</u>         | <u>IRR</u>  |  |
| Negative Urgency                | <b>-0.08 (0.04)*</b>                                                 | <b>0.92*</b> | <b>0.05 (0.02)**</b>  | <b>1.05</b> |  |
| NEAT                            | 0.00 (0.03)                                                          | 1.00         | <b>0.02 (0.01)*</b>   | <b>1.02</b> |  |
| <b>Step 3:</b>                  | $\chi^2(2, 85) = 5.28$ , Log-likelihood: -183.52                     |              |                       |             |  |
| <b>Full Model:</b>              | $\chi^2(14, 85) = 45.78^{***}$ , AIC: 401.04                         |              |                       |             |  |

Note. IRR = Incident Risk Ratio; AIC = Akaike's Information Criterion. <sup>a</sup>Model statistics with NEAT entered at Step 2 (prior to negative urgency); model comparison evaluated using likelihood ratio testing. All other chi-square values obtained at each step via Wald tests; full model chi-square derived from comparison against null (constant-only) model. \* $p < .05$ ; \*\* $p < .01$ ; \*\*\* $p < .001$ .

**Supplementary Table 2.** ZINB regression analyses predicting past-month loss-of-control (LOC) eating frequency (N=102)

| <b>EDE-Q LOC Eating</b>         |                                                                     |            |                      |             |  |
|---------------------------------|---------------------------------------------------------------------|------------|----------------------|-------------|--|
|                                 | <b>Logistic Model</b>                                               |            | <b>Count Model</b>   |             |  |
| <b>Step 1.</b>                  | <b>B (SE)</b>                                                       | <b>IRR</b> | <b>B (SE)</b>        | <b>IRR</b>  |  |
| Sex                             | 0.54 (1.13)                                                         | 1.71       | <b>1.44 (0.69)*</b>  | <b>4.24</b> |  |
| Orientation                     | 0.96 (1.02)                                                         | 2.62       | <b>1.43 (0.69)*</b>  | <b>4.17</b> |  |
| Race                            | 1.30 (0.70)                                                         | 3.66       | 0.28 (0.49)          | 1.33        |  |
| NSSI History                    | -1.23 (0.94)                                                        | 0.29       | -0.51 (0.56)         | 0.60        |  |
| ESST Accuracy                   | 0.08 (0.06)                                                         | 1.08       | 0.03 (0.02)          | 1.03        |  |
| <b>Step 1:</b>                  | $\chi^2(10, 89) = 22.74^*$ , Log-likelihood: -139.26                |            |                      |             |  |
| <b>Step 2.</b>                  | <b>B (SE)</b>                                                       | <b>IRR</b> | <b>B (SE)</b>        | <b>IRR</b>  |  |
| Negative Urgency                | -0.12 (0.07)                                                        | 0.89       | <b>0.06 (0.03)*</b>  | <b>1.06</b> |  |
| NEAT <sup>a</sup>               | -0.05 (0.03)                                                        | 0.95       | <b>0.03 (0.02)*</b>  | <b>1.03</b> |  |
| <b>Step 2:</b>                  | $\chi^2(2, 87) = 12.06^{**}$ , Log-likelihood: -131.65              |            |                      |             |  |
| <b>Step 2 model comparison:</b> | $\chi^2(0, 15) = 4.54^{***}$ , Log-likelihood: -133.92 <sup>a</sup> |            |                      |             |  |
| <b>Step 3.</b>                  | <b>B (SE)</b>                                                       | <b>IRR</b> | <b>B (SE)</b>        | <b>IRR</b>  |  |
| Negative Urgency                | -0.05 (0.04)                                                        | 0.96       | <b>0.06 (0.02)**</b> | <b>1.07</b> |  |
| NEAT                            | -0.03 (0.02)                                                        | 0.98       | <b>0.03 (0.01)*</b>  | <b>1.03</b> |  |
| <b>Step 3:</b>                  | $\chi^2(2, 85) = 9.86^{**}$ , Log-likelihood: -129.62               |            |                      |             |  |
| <b>Full Model:</b>              | $\chi^2(14, 85) = 47.51^{***}$ , AIC: 293.25                        |            |                      |             |  |

Note. IRR = Incident Risk Ratio; AIC = Akaike's Information Criterion. <sup>a</sup>Model statistics with NEAT entered at Step 2 (prior to negative urgency); model comparison evaluated using likelihood ratio testing. All other chi-square values obtained at each step via Wald tests; full model chi-square derived from comparison against null (constant-only) model. \* $p < .05$ ; \*\* $p < .01$ ; \*\*\* $p < .001$ .

**Supplementary Table 3.** ZINB regression analyses predicting binge eating frequency (N = 102)

| EDE-Q Binge Eating Days         |                                                                     |             |                       |             |
|---------------------------------|---------------------------------------------------------------------|-------------|-----------------------|-------------|
|                                 | Logistic Model                                                      |             | Count Model           |             |
| <u>Step 1.</u>                  | <u>B (SE)</u>                                                       | <u>IRR</u>  | <u>B (SE)</u>         | <u>IRR</u>  |
| Sex                             | 1.59 (1.50)                                                         | 5.10        | <b>1.44 (0.58)*</b>   | <b>4.22</b> |
| Orientation                     | 0.75 (0.84)                                                         | 1.88        | 0.99 (0.54)           | 2.51        |
| Race/Ethnicity                  | 0.99 (0.72)                                                         | 2.57        | -0.77 (0.51)          | 0.46        |
| NSSI History                    | -0.99 (0.79)                                                        | 0.43        | -0.34 (0.50)          | 0.71        |
| ESST Accuracy                   | 0.12 (0.07)                                                         | 1.13        | <b>0.05 (0.02)*</b>   | <b>1.06</b> |
| <b>Step 1:</b>                  | $\chi^2(10, 89) = 21.34^*$ , Log-likelihood: -131.74                |             |                       |             |
| <u>Step 2.</u>                  | <u>B (SE)</u>                                                       | <u>IRR</u>  | <u>B (SE)</u>         | <u>IRR</u>  |
| Negative Urgency                | <b>-0.12 (0.05)*</b>                                                | <b>0.89</b> | <b>0.07 (0.02)**</b>  | <b>1.07</b> |
| NEAT <sup>a</sup>               | -0.08 (0.03)                                                        | 0.92        | <b>0.05 (0.02)**</b>  | <b>1.05</b> |
| <b>Step 2:</b>                  | $\chi^2(2, 87) = 18.93^{***}$ , Log-likelihood: -121.60             |             |                       |             |
| <b>Step 2 model comparison:</b> | $\chi^2(0, 15) = 1.36^{***}$ , Log-likelihood: -122.28 <sup>a</sup> |             |                       |             |
| <u>Step 3.</u>                  | <u>B (SE)</u>                                                       | <u>IRR</u>  | <u>B (SE)</u>         | <u>IRR</u>  |
| Negative Urgency                | -2.55 (2.44)                                                        | 0.08        | <b>0.07 (0.02)***</b> | <b>1.08</b> |
| NEAT                            | -6.38 (6.07)                                                        | 0.00        | 0.02 (0.02)           | 1.02        |
| <b>Step 3:</b>                  | $\chi^2(2, 85) = 2.46$ , Log-likelihood: -106.11                    |             |                       |             |
| <b>Full Model:</b>              | $\chi^2(14, 85) = 41.93^{***}$ , AIC: 246.22                        |             |                       |             |

Note. IRR = Incident Risk Ratio; AIC = Akaike's Information Criterion. <sup>a</sup>Model statistics with NEAT entered at Step 2 (prior to negative urgency); model comparison evaluated using likelihood ratio testing. All other chi-square values obtained at each step via Wald tests; full model chi-square derived from comparison against null (constant-only) model. \* $p < .05$ ; \*\* $p < .01$ ; \*\*\* $p < .001$ .

**Supplementary Table 4.** ZINB regression analyses predicting frequency of past-month compensatory behaviors (N = 102)

| EDE-Q Compensatory Behaviors    |                                                                        |                      |                       |              |
|---------------------------------|------------------------------------------------------------------------|----------------------|-----------------------|--------------|
|                                 | Logistic Model                                                         |                      | Count Model           |              |
| <u>Step 1.</u>                  | <u>B (SE)</u>                                                          | <u>IRR</u>           | <u>B (SE)</u>         | <u>IRR</u>   |
| Sex                             | 14.27 (223.19)                                                         | 158.15 <sup>e4</sup> | <b>2.64 (0.43)***</b> | <b>13.96</b> |
| Orientation                     | 1.75 (1.04)                                                            | 5.75                 | <b>2.31 (0.41)***</b> | <b>10.09</b> |
| Race                            | 0.01 (0.57)                                                            | 1.00                 | <b>0.67 (0.32)*</b>   | <b>1.96</b>  |
| NSSI History                    | -1.86 (0.97)                                                           | 0.16                 | <b>-1.14 (0.36)**</b> | <b>0.32</b>  |
| ESST Accuracy                   | 0.05 (0.04)                                                            | 1.05                 | 0.02 (0.01)           | 1.02         |
| <b>Step 1:</b>                  | $\chi^2(10, 89) = 54.29***$ , Log-likelihood: <b>-153.51</b>           |                      |                       |              |
| <u>Step 2.</u>                  | <u>B (SE)</u>                                                          | <u>IRR</u>           | <u>B (SE)</u>         | <u>IRR</u>   |
| Negative Urgency                | -0.05 (0.04)                                                           | 0.95                 | 0.00 (0.02)           | 1.00         |
| NEAT <sup>a</sup>               | <b>-0.08 (0.04)*</b>                                                   | <b>0.92</b>          | -0.02 (0.01)          | 0.98         |
| <b>Step 2:</b>                  | $\chi^2(2, 87) = 1.54$ , Log-likelihood: -152.70                       |                      |                       |              |
| <b>Step 2 model comparison:</b> | $\chi^2(0, 15) = 8.97***$ , Log-likelihood: <b>-148.22<sup>a</sup></b> |                      |                       |              |
| <u>Step 3.</u>                  | <u>B (SE)</u>                                                          | <u>IRR</u>           | <u>B (SE)</u>         | <u>IRR</u>   |
| Negative Urgency                | -0.06 (0.05)                                                           | 0.94                 | 0.01 (0.02)           | 1.00         |
| NEAT                            | <b>-0.09 (0.04)*</b>                                                   | <b>0.92</b>          | -0.03 (0.02)          | 0.98         |
| <b>Step 3:</b>                  | $\chi^2(2, 85) = 7.98*$ , Log-likelihood: <b>-147.33</b>               |                      |                       |              |
| <b>Full Model:</b>              | $\chi^2(14, 85) = 57.65***$ , AIC: 328.65                              |                      |                       |              |

Note. IRR = Incident Risk Ratio; AIC = Akaike's Information Criterion. <sup>a</sup>Model statistics with NEAT entered at Step 2 (prior to negative urgency); model comparison evaluated using likelihood ratio testing. All other chi-square values obtained at each step via Wald tests; full model chi-square derived from comparison against null (constant-only) model. \* $p < .05$ ; \*\* $p < .01$ ; \*\*\* $p < .001$ .

## Supplementary Results

*Alternative model for EDE-Q Weight Concerns (see Footnote 2 in the main text)*

We ran an exploratory alternative model for EDE-Q Weight Scores, in which we entered NEAT on Step 2 ahead of Negative Urgency (entered on Step 3). In this model, NEAT had a main effect on EDE-Q Weight Concerns,  $B = 0.02$ ,  $SE = 0.01$ ,  $F_{change}(1, 95) = 4.95$ ,  $p = 0.28$ ,  $R^2_{change} = .04$ . NEAT's effect on this subscale ( $B = 0.02$ ,  $SE = 0.01$ ,  $\beta = 0.17$ ,  $p = 0.64$ ) was no longer evident when Negative Urgency was included in the final step ( $B = 0.06$ ,  $SE = 0.00$ ,  $\beta = 0.30$ ,  $p = 0.003$ ), confirming that Negative Urgency had additional predictive utility beyond the effect of NEAT.
